# Supplementary material for: The EUPPBench postprocessing benchmark dataset v1.0
Source: Copernicus journal article supplement (doi:10.5194/essd-15-2635-2023), 2023-06-28
Supplement: Supplementary file 1 [file essd-15-2635-2023-supplement.zip]

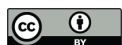

*Supplement of*

## **The EUPPBench postprocessing benchmark dataset v1.0**

**Jonathan Demaeyer et al.**

*Correspondence to:* Jonathan Demaeyer ([jonathan.demaeyer@meteo.be](mailto:jonathan.demaeyer@meteo.be))

- [essd-15-2635-2023-supplement-title-page.pdf](#)
- [EUPP\\_doc.pdf](#)
- [SI.pdf](#)

The copyright of individual parts of the supplement might differ from the article licence.
