# Supplementary material for: The EUPPBench postprocessing benchmark dataset v1.0
Source: Copernicus journal article supplement (doi:10.5194/essd-15-2635-2023), 2023-06-28
Supplement: Supplementary file 2 [file essd-15-2635-2023-supplement.zip]

# Supplementary Information for "The EUPPBench postprocessing benchmark dataset v1.0"

Jonathan Demaeyer<sup>1,2</sup>, Jonas Bhend<sup>3</sup>, Sebastian Lerch<sup>4</sup>, Cristina Primo<sup>5</sup>, Bert Van Schaeybroeck<sup>1</sup>, Aitor Atencia<sup>6</sup>, Zied Ben Bouallègue<sup>7</sup>, Jieyu Chen<sup>4</sup>, Markus Dabernig<sup>6</sup>, Gavin Evans<sup>8</sup>, Jana Faganeli Pucer<sup>9</sup>, Ben Hooper<sup>8</sup>, Nina Horat<sup>4</sup>, David Jobst<sup>10</sup>, Janko Merše<sup>11</sup>, Peter Mlakar<sup>9,11</sup>, Annette Möller<sup>12</sup>, Olivier Mestre<sup>13</sup>, Maxime Taillardat<sup>13</sup>, and Stéphane Vannitsem<sup>1,2</sup>

<sup>1</sup>Royal Meteorological Institute of Belgium, Brussels, Belgium

<sup>2</sup>European Meteorological Network (EUMETNET), Brussels, Belgium

<sup>3</sup>Federal Office of Meteorology and Climatology MeteoSwiss, Zurich, Switzerland

<sup>4</sup>Karlsruhe Institute of Technology, Karlsruhe, Germany

<sup>5</sup>Deutscher Wetterdienst, Offenbach, Germany

<sup>6</sup>GeoSphere Austria, Vienna, Austria

<sup>7</sup>European Centre for Medium-Range Weather Forecasts, Reading, United Kingdom

<sup>8</sup>Met Office, Exeter, United Kingdom

<sup>9</sup>University of Ljubljana, Faculty of Computer and Information Science, Slovenia

<sup>10</sup>University of Hildesheim, Hildesheim, Germany

<sup>11</sup>Slovenian Environment Agency, Ljubljana, Slovenia

<sup>12</sup>Bielefeld University, Bielefeld, Germany

<sup>13</sup>Meteo France, Ecole Nationale de la Meteorologie, Toulouse, France

**Correspondence:** Jonathan Demaeyer (Jonathan.Demaeyer@meteo.be)

In this supplementary information, we provide an usage example for the dataset, and present additional way to access the data with other programming languages.

## 1 Dataset usage example with climetlab

In this section, we describe a simple usage example in Python where a set of forecasts and observations is downloaded using a dedicated climetlab plugin. We assume that the reader has installed climetlab.

We point out that other packages are currently being developed in other languages to download data from Zarr datastore (see the next section), which is the format in which the datasets are stored, however we present in this section the only official and mature enough method. Once downloaded in *xarray* dataset, the data can easily be recovered and stored on hard drives using the usual file formats. See the *xarray* documentation for more information.

With climetlab, it is very easy to download the data that you need in the dataset. The simple piece of code below download the forecasts and observations of instantaneous variables for Germany:

Installation with `pip` (if needed)

```
[1]: #!pip install matplotlib  
#!pip install climetlab  
#!pip install climetlab-eumetnet-postprocessing-benchmark
```

Loading climetlab

```
[2]: import climetlab as cml
```

and matplotlib

```
[3]: import matplotlib.pyplot as plt
```

### Example with deterministic forecasts

Download of deterministic high-resolution forecasts (for the 2 metre temperature) at every nearest grid point of the station points

```
[4]: ds = cml.load_dataset('EUPPBench-training-data-stations-forecasts-surface',  
    ↪ "highres", "germany")
```

By downloading data from this dataset, you agree to the terms and conditions defined at

[https://github.com/Climdyn/climetlab-eumetnet-postprocessing-benchmark/blob/main/DATA\\_LICENSE](https://github.com/Climdyn/climetlab-eumetnet-postprocessing-benchmark/blob/main/DATA_LICENSE)

If you do not agree with such terms, do not download the data.

The `ds` object returned is a climetlab datasource that can be converted to various format. Note that the data are cached temporarily on your disk so next time you ask for this forecast I might be faster.

For example, conversion to a `xarray` :

```
[5]: fcs = ds.to_xarray()  
fcs
```

```
[5]: <xarray.Dataset>  
Dimensions:                (station_id: 51, number: 1, time: 730, step: 21,  
surface: 1, depthBelowLandLayer: 1)  
Coordinates: (12/16)  
  * depthBelowLandLayer    (depthBelowLandLayer) float64 0.0  
    model_altitude         (station_id) float32 ...  
    model_land_usage       (station_id) int8 ...  
    model_latitude         (station_id) float64 ...  
    model_longitude        (station_id) float64 ...  
    model_orography        (station_id) float64 ...
```

```

...
station_latitude (station_id) float64 ...
station_longitude (station_id) float64 ...
station_name (station_id) <U20 ...
* step (step) timedelta64[ns] 0 days 00:00:00 ... 5 days 00...
* surface (surface) float64 0.0
* time (time) datetime64[ns] 2017-01-01 ... 2018-12-31
Data variables: (12/15)
    cape (station_id, number, time, step, surface) float32 ...
    cin (station_id, number, time, step, surface) float32 ...
    sd (station_id, number, time, step, surface) float32 ...
    stl1 (station_id, number, time, step, depthBelowLandLayer)
float32 ...
    swvl1 (station_id, number, time, step, depthBelowLandLayer)
float32 ...
    t2m (station_id, number, time, step, surface) float32 ...
    ...
    u10 (station_id, number, time, step, surface) float32 ...
    u100 (station_id, number, time, step, surface) float32 ...
    v10 (station_id, number, time, step, surface) float32 ...
    v100 (station_id, number, time, step, surface) float32 ...
    valid_time (time, step) datetime64[ns] ...
    vis (station_id, number, time, step, surface) float32 ...
Attributes:
    Conventions: CF-1.7
    GRIB_centre: ecmf
    GRIB_centreDescription: European Centre for Medium-Range Weather Forecasts
    GRIB_edition: 1
    GRIB_subCentre: 0
    history: 2022-07-08T12:53 GRIB to CDM+CF via cfgrib-0.9.1...
    institution: European Centre for Medium-Range Weather Forecasts
    land usage history: Retrieved from https://land.copernicus.eu/pan-eu...
    land usage legend: {1: {'label': '111 - Continuous urban fabric', '...
    land usage source: European Union, Copernicus Land Monitoring Servi...
    model altitude history: Retrieved from https://land.copernicus.eu/imager...
    model altitude source: European Union, Copernicus Land Monitoring Servi...

```

Retrieving the observations corresponding to the forecasts (in xarray format)

```
[6]: obs = ds.get_observations_as_xarray()
obs
```

```
[6]: <xarray.Dataset>
Dimensions: (station_id: 51, step: 21, time: 730)
Coordinates:
    altitude (station_id) float64 ...
    land_usage (station_id) int8 ...

```

```

latitude      (station_id) float64 ...
longitude      (station_id) float64 ...
* station_id   (station_id) int32 460 662 691 704 953 ... 5705 5839 5871 5906
station_name   (station_id) <U20 ...
* step         (step) timedelta64[ns] 0 days 00:00:00 ... 5 days 00:00:00
* time         (time) datetime64[ns] 2017-01-01 2017-01-02 ... 2018-12-31
Data variables:
    t2m        (time, step, station_id) float64 ...
    tcc        (time, step, station_id) float64 ...
    vis        (time, step, station_id) float64 ...
Attributes:
    full_dataset_metadata:
    history:      Retrieved from https://opendata.dwd.de/climate_en...
    land usage history: Retrieved from https://land.copernicus.eu/pan-eur...
    land usage legend: {1: {'label': '111 - Continuous urban fabric', 'n...
    land usage source: European Union, Copernicus Land Monitoring Servic...
    source:      DWD, Deutscher Wetterdienst, https://www.dwd.de/

```

Plotting all the observations and the forecasts after 24 hours of forecast lead time and at 3 different stations

```

[7]: stations=[1,20,40]

plt.figure(figsize=(13, 13))

for station in stations:
    plt.plot(obs.t2m.isel(station_id=station, step=4).to_numpy(), fcs.t2m.
        ↳ isel(station_id=station, surface=0, step=4, number=0).to_numpy(), ls='-',
        ↳ marker='o', ms=1.2, label=obs.station_name.isel(station_id=station).to_numpy())

plt.ylabel('Deterministic forecasts ['+fcs.t2m.units+']')
plt.xlabel('Observations ['+fcs.t2m.units+']')
plt.title('Observations and forecasts at 24 hours lead time')
plt.legend();

```

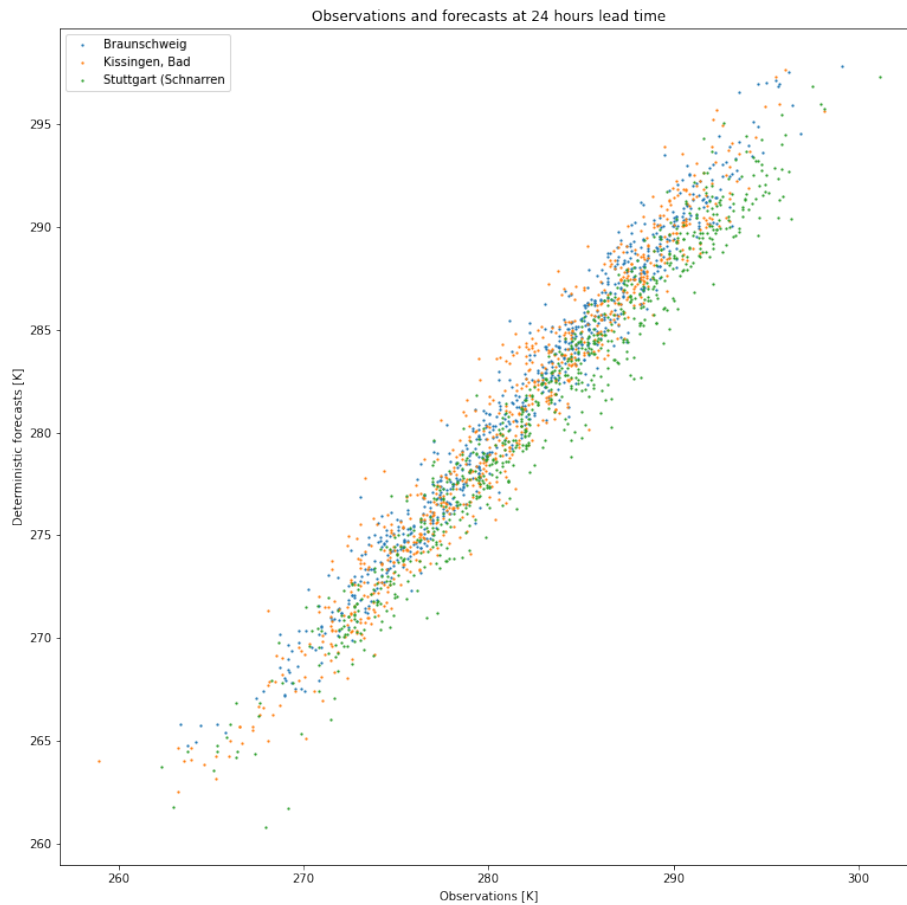

Plotting the observations and a forecast at 3 different stations (forecasts are solid lines, observations are dashed lines)

```
[8]: stations=[1,20,40]

plt.figure(figsize=(13, 8))

for station in stations:
    line = fcs.t2m.isel(station_id=station, time=100, surface=0, number=0).
    plot(label=obs.station_name.isel(station_id=station).to_numpy())
    obs.t2m.isel(station_id=station, time=100).plot(ls='--', color=line[0].
    get_color())
```

```
plt.legend();
```

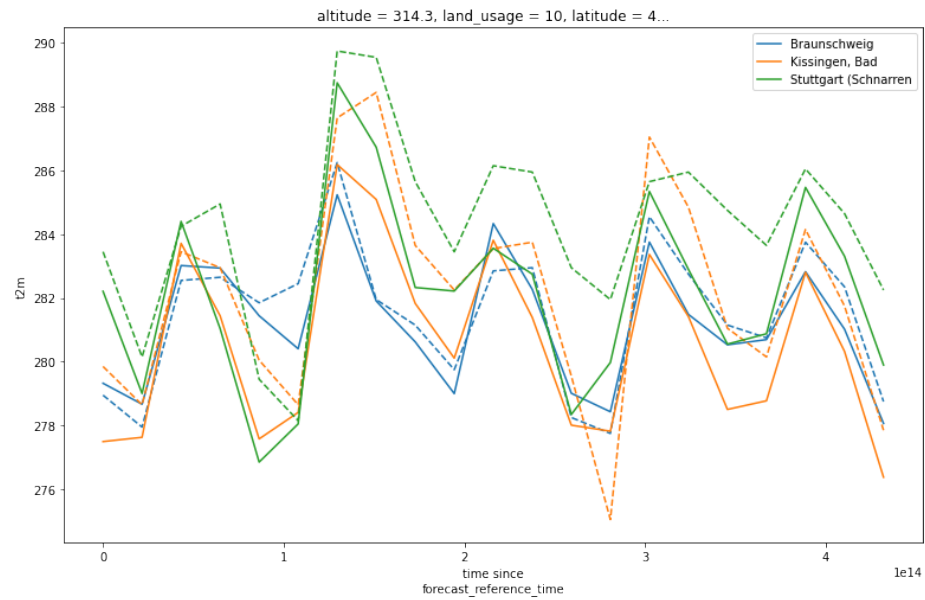

## 2 Accessing the dataset with other methods and programming languages

In this section, we document two other ways to access the dataset, one with R and another one with Julia. Both are presently less efficient than using directly the climetlab plugin, but there will probably be quick improvement to Zarr support soon for these two languages.

### 2.1 Access with Julia

It is possible to access directly the dataset with Julia (Bezanson et al., 2017) using the *Zarr.jl* package (<https://github.com/JuliaIO/Zarr.jl>). A simple piece of code on the next pages download the forecasts of instantaneous variables for Germany. Please note that this download only the forecasts. Unlike with climetlab, with this method the users need to download the observations separately.

```
[1]: using Zarr
```

```
[2]: data = zopen("https://storage.ecmwf.europeanweather.cloud/
↳eumetnet-postprocessing-benchmark-1st-phase-training-dataset/data/
↳stations_data/stations_ensemble_forecasts_surface_germany.zarr")
```

Warning: In the future, fill values will not be interpreted as missing values by default.

Please set the keyword argument `fill\_as\_missing` to a boolean accordingly.

Setting to `true`

for now, but in the future `false` will be the default.

@ Zarr /home/jupyter-jodemaey/.julia/packages/Zarr/T6jFD/src/metadata.jl:182

```
[2]: ZarrGroup at Consolidated
Zarr.HTTPStore("https://storage.ecmwf.europeanweather.cloud/eumetnet-
postprocessing-benchmark-1st-phase-training-
dataset/data/stations_data/stations_ensemble_forecasts_surface_germany.zarr")
and path
Variables: number swvl1 time station_id depthBelowLandLayer stl1 surface tcwv
t2m station_altitude cape u10 v100 station_land_usage step model_orography
station_name valid_time vis tcc model_land_usage v10 model_altitude
model_longitude model_latitude sd tcw u100 station_latitude cin
station_longitude
```

```
[3]: data.arrays
```

```
[3]: Dict{String, ZArray} with 31 entries:
  "number"          => ZArray{Int64} of size 51
  "swvl1"           => ZArray{Union{Missing, Float32}} of size 1 x 21 x 730...
  "time"            => ZArray{Int64} of size 730
  "station_id"      => ZArray{Int32} of size 51
  "depthBelowLandLayer" => ZArray{Union{Missing, Float64}} of size 1
  "stl1"           => ZArray{Union{Missing, Float32}} of size 1 x 21 x 730...
  "surface"         => ZArray{Union{Missing, Float64}} of size 1
  "tcwv"           => ZArray{Union{Missing, Float32}} of size 1 x 21 x 730...
  "t2m"            => ZArray{Union{Missing, Float32}} of size 1 x 21 x 730...
  "station_altitude" => ZArray{Union{Missing, Float64}} of size 51
  "cape"           => ZArray{Union{Missing, Float32}} of size 1 x 21 x 730...
  "u10"            => ZArray{Union{Missing, Float32}} of size 1 x 21 x 730...
  "v100"           => ZArray{Union{Missing, Float32}} of size 1 x 21 x 730...
```



```

"station_land_usage" => ZArray{Int8} of size 51
"step"               => ZArray{Union{Missing, Float64}} of size 21
"model_orography"    => ZArray{Union{Missing, Float64}} of size 51
"station_name"       => ZArray{MaxLengthString{20, UInt32}} of size 51
"valid_time"         => ZArray{Union{Missing, Float64}} of size 21 x 730
"vis"                => ZArray{Union{Missing, Float32}} of size 1 x 21 x 730...
"tcc"                => ZArray{Union{Missing, Float32}} of size 1 x 21 x 730...
"model_land_usage"   => ZArray{Int8} of size 51
"v10"                => ZArray{Union{Missing, Float32}} of size 1 x 21 x 730...
"model_altitude"     => ZArray{Union{Missing, Float32}} of size 51
"model_longitude"    => ZArray{Union{Missing, Float64}} of size 51
"model_latitude"     => ZArray{Union{Missing, Float64}} of size 51
=>

```

```
[4]: data.attrs
```

```

[4]: Dict{String, Any} with 13 entries:
  "history"          => "2022-07-05T05:36 GRIB to CDM+CF via cfgrib-0.9.
  "model altitude history" => "Retrieved from https://land.copernicus.eu/
  "coordinates"       => "station_longitude station_land_usage
  "model_latit..."   => "European Union, Copernicus Land Monitoring
  "GRIB_subCentre"    => 0
  "GRIB_centre"       => "ecmf"
  "Conventions"       => "CF-1.7"
  "GRIB_edition"      => 1
  "land usage history" => "Retrieved from https://land.copernicus.eu/
  "GRIB_centreDescription" => "European Centre for Medium-Range Weather
  "land usage source"  => "European Union, Copernicus Land Monitoring
  "land usage legend"  => "{1: {'label': '111 - Continuous urban fabric',
  "institution"       => "European Centre for Medium-Range Weather

```

```
[5]: data["t2m"][1,:,:1,1]
```

```
[5]: 21×730 reshape(::Array{Union{Missing, Float32}, 5}, 21, 730) with eltype
Union{Missing, Float32}:
270.874 271.376 271.056 272.13 ... 271.457 269.911 276.188 277.99
270.24 271.518 270.594 273.258 270.127 270.396 276.181 278.07
271.216 273.036 273.406 274.377 273.77 274.027 275.479 281.514
271.843 270.968 272.291 274.022 272.508 273.511 275.175 279.256
270.88 266.947 272.759 273.401 271.077 276.466 276.391 275.929
270.541 266.583 273.681 269.755 ... 272.236 276.533 277.074 276.775
273.121 272.155 274.59 274.344 275.111 277.453 279.911 278.509
271.396 271.268 273.967 268.476 275.237 276.013 277.994 278.131
267.665 271.948 272.801 265.923 277.755 276.444 276.077 276.212
266.94 273.266 270.569 265.149 277.121 277.435 276.587 274.463
272.674 274.367 273.443 269.81 ... 278.655 281.141 278.222 277.725
270.727 274.365 268.27 266.044 276.537 277.421 277.719 274.0
271.234 272.017 266.085 266.14 276.899 272.958 276.287 269.17
273.093 270.362 264.669 265.22 277.88 276.353 275.018 268.034
274.785 275.022 270.547 271.359 281.547 277.771 277.918 276.006
275.386 267.891 267.632 271.165 ... 275.988 277.374 273.3 272.919
272.027 266.146 265.711 271.632 271.806 277.746 271.072 273.124
270.336 265.33 266.036 272.649 273.796 273.537 269.298 270.421
275.577 271.618 273.295 273.966 277.395 277.513 275.847 276.433
269.762 267.022 271.885 273.654 276.732 272.56 273.493 274.972
268.224 264.677 272.047 273.384 ... 276.54 269.284 272.17 274.233
```

## 2.2 Access with R

- 30 It also possible to access directly the dataset with R using the *reticulate* package to load two Python packages, *xarray* (Hoyer and Joseph, 2017) and *fsspec*, and then use them to load the data in R. Again, a simple piece of code on the next pages download the forecasts of instantaneous variables for Germany. Please note that this download only the forecasts. Unlike with *climetlab*, with this method the users need to download the observations separately.

```
[1]: library(reticulate)

[2]: xarray <- import("xarray")

[3]: fsspec <- import("fsspec")

[4]: target_fcs <- fsspec$get_mapper("https://storage.ecmwf.europeanweather.cloud/
    ↪eumetnet-postprocessing-benchmark-1st-phase-training-dataset/data/
    ↪stations_data/stations_ensemble_forecasts_surface_germany.zarr")

[5]: fcs <- xarray$open_zarr(target_fcs)

[6]: fcs
```

```
<xarray.Dataset>
Dimensions:                (station_id: 51, number: 51, time: 730, step: 21,
                             surface: 1, depthBelowLandLayer: 1)
Coordinates: (12/16)
  * depthBelowLandLayer    (depthBelowLandLayer) float64 0.0
    model_altitude         (station_id) float32 ...
    model_land_usage       (station_id) int8 ...
    model_latitude         (station_id) float64 ...
    model_longitude        (station_id) float64 ...
    model_orography        (station_id) float64 ...
    ...
    station_latitude       (station_id) float64 ...
    station_longitude      (station_id) float64 ...
    station_name           (station_id) <U20 ...
  * step                   (step) timedelta64[ns] 0 days 00:00:00 ... 5 days 00:...
  * surface                (surface) float64 0.0
  * time                   (time) datetime64[ns] 2017-01-01 ... 2018-12-31
Data variables: (12/15)
    cape                   (station_id, number, time, step, surface) float32 ...
    cin                   (station_id, number, time, step, surface) float32 ...
    sd                    (station_id, number, time, step, surface) float32 ...
    stl1                  (station_id, number, time, step, depthBelowLandLayer) ↵
    ↪float32 ...
    swvl1                 (station_id, number, time, step, depthBelowLandLayer) ↵
    ↪float32 ...
    t2m                   (station_id, number, time, step, surface) float32 ...
    ...
    u10                   (station_id, number, time, step, surface) float32 ...
    u100                  (station_id, number, time, step, surface) float32 ...
    v10                   (station_id, number, time, step, surface) float32 ...
    v100                  (station_id, number, time, step, surface) float32 ...
    valid_time            (time, step) datetime64[ns] ...
    vis                   (station_id, number, time, step, surface) float32 ...
```

```
Attributes:
  Conventions:          CF-1.7
  GRIB_centre:          ecmf
  GRIB_centreDescription: European Centre for Medium-Range Weather Forecasts
  GRIB_edition:          1
  GRIB_subCentre:        0
  history:              2022-07-05T05:36 GRIB to CDM+CF via cfgrib-0.9.1...
  institution:          European Centre for Medium-Range Weather Forecasts
  land usage history:    Retrieved from https://land.copernicus.eu/pan-eu...
  land usage legend:     {1: {'label': '111 - Continuous urban fabric', '...
  land usage source:     European Union, Copernicus Land Monitoring Servi...
  model altitude history: Retrieved from https://land.copernicus.eu/imager...
  model altitude source: European Union, Copernicus Land Monitoring Servi...
```

```
[7]: fcs$t2m
```

```
<xarray.DataArray 't2m' (station_id: 51, number: 51, time: 730, step: 21,
                        surface: 1)>
[39873330 values with dtype=float32]
Coordinates: (12/15)
  model_altitude      (station_id) float32 ...
  model_land_usage     (station_id) int8 ...
  model_latitude       (station_id) float64 ...
  model_longitude      (station_id) float64 ...
  model_orography      (station_id) float64 ...
  * number             (number) int64 0 1 2 3 4 5 6 7 ... 44 45 46 47 48 49 50
  ...                 ...
  station_latitude     (station_id) float64 ...
  station_longitude    (station_id) float64 ...
  station_name         (station_id) <U20 ...
  * step               (step) timedelta64[ns] 0 days 00:00:00 ... 5 days 00:...
  * surface            (surface) float64 0.0
  * time               (time) datetime64[ns] 2017-01-01 ... 2018-12-31
Attributes:
  GRIB_NV:              0
  GRIB_Nx:              93
  GRIB_Ny:              125
  GRIB_cfName:          unknown
  GRIB_cfVarName:       t2m
  GRIB_gridDefinitionDescription: Latitude/Longitude Grid
  GRIB_gridType:        regular_ll
  GRIB_iDirectionIncrementInDegrees: 0.25
  GRIB_iScansNegatively: 0
  GRIB_jDirectionIncrementInDegrees: 0.25
  GRIB_jPointsAreConsecutive: 0
  GRIB_jScansPositively: 0
  GRIB_latitudeOfFirstGridPointInDegrees: 67.0
  GRIB_latitudeOfLastGridPointInDegrees: 36.0
```

```

GRIB_longitudeOfFirstGridPointInDegrees: -6.0
GRIB_longitudeOfLastGridPointInDegrees: 17.0
GRIB_missingValue: 9999
GRIB_name: 2 metre temperature
GRIB_numberOfPoints: 11625
GRIB_paramId: 167
GRIB_shortName: 2t
GRIB_stepType: instant
GRIB_stepUnits: 1
GRIB_totalNumber: 51
GRIB_typeOfLevel: surface
GRIB_units: K
coordinates: number time step surface latitu...
long_name: 2 metre temperature
standard_name: unknown
units: K

```

```
[8]: t2m <- fcs$t2m$to_numpy()
```

```
[9]: dim(t2m)
```

```
1. 51 2. 51 3. 730 4. 21 5. 1
```

## 2.3 Path to the datasets

The two methods proposed in Sections 2.1 and 2.2 require the users to provide the path to the dataset data that they want to retrieve.

40 To construct this path, one must use the prefix

<https://storage.ecmwf.europeanweather.cloud/eumetnet-postprocessing-benchmark-1st-phase-training-dataset/data/>

followed by the local path of the data you wish to access:

- gridded\_data/
  - gridded\_000z.zarr
  - 45 – gridded\_ensemble\_forecasts\_pressure\_500.zarr
  - gridded\_ensemble\_forecasts\_pressure\_700.zarr
  - gridded\_ensemble\_forecasts\_pressure\_850.zarr
  - gridded\_ensemble\_forecasts\_surface.zarr
  - gridded\_ensemble\_forecasts\_surface\_postprocessed.zarr
  - 50 – gridded\_ensemble\_reforecasts\_pressure\_500.zarr
  - gridded\_ensemble\_reforecasts\_pressure\_700.zarr
  - gridded\_ensemble\_reforecasts\_pressure\_850.zarr
  - gridded\_ensemble\_reforecasts\_surface.zarr
  - gridded\_ensemble\_reforecasts\_surface\_postprocessed.zarr
  - 55 – gridded\_forecasts\_efi.zarr
  - gridded\_forecasts\_observations\_pressure\_500.zarr
  - gridded\_forecasts\_observations\_pressure\_700.zarr
  - gridded\_forecasts\_observations\_pressure\_850.zarr
  - gridded\_forecasts\_observations\_surface.zarr
  - 60 – gridded\_forecasts\_observations\_surface\_postprocessed.zarr
  - gridded\_highres\_forecasts\_pressure\_500.zarr
  - gridded\_highres\_forecasts\_pressure\_700.zarr
  - gridded\_highres\_forecasts\_pressure\_850.zarr
  - gridded\_highres\_forecasts\_surface.zarr

- 65      – gridded\_highres\_forecasts\_surface\_postprocessed.zarr
- gridded\_land\_usage.zarr
- gridded\_model\_terrain\_height.zarr
- gridded\_reforecasts\_observations\_pressure\_500.zarr
- gridded\_reforecasts\_observations\_pressure\_700.zarr
- 70      – gridded\_reforecasts\_observations\_pressure\_850.zarr
- gridded\_reforecasts\_observations\_surface.zarr
- gridded\_reforecasts\_observations\_surface\_postprocessed.zarr
- stations\_data/
  - stations\_ensemble\_forecasts\_pressure\_500\_austria.zarr
  - 75      – stations\_ensemble\_forecasts\_pressure\_500\_belgium.zarr
  - stations\_ensemble\_forecasts\_pressure\_500\_france.zarr
  - stations\_ensemble\_forecasts\_pressure\_500\_germany.zarr
  - stations\_ensemble\_forecasts\_pressure\_500\_netherlands.zarr
  - stations\_ensemble\_forecasts\_pressure\_700\_austria.zarr
  - 80      – stations\_ensemble\_forecasts\_pressure\_700\_belgium.zarr
  - stations\_ensemble\_forecasts\_pressure\_700\_france.zarr
  - stations\_ensemble\_forecasts\_pressure\_700\_germany.zarr
  - stations\_ensemble\_forecasts\_pressure\_700\_netherlands.zarr
  - stations\_ensemble\_forecasts\_pressure\_850\_austria.zarr
  - 85      – stations\_ensemble\_forecasts\_pressure\_850\_belgium.zarr
  - stations\_ensemble\_forecasts\_pressure\_850\_france.zarr
  - stations\_ensemble\_forecasts\_pressure\_850\_germany.zarr
  - stations\_ensemble\_forecasts\_pressure\_850\_netherlands.zarr
  - stations\_ensemble\_forecasts\_surface\_austria.zarr
  - 90      – stations\_ensemble\_forecasts\_surface\_belgium.zarr
  - stations\_ensemble\_forecasts\_surface\_france.zarr
  - stations\_ensemble\_forecasts\_surface\_germany.zarr



- stations\_ensemble\_forecasts\_surface\_netherlands.zarr
- stations\_ensemble\_forecasts\_surface\_postprocessed\_austria.zarr
- 95    – stations\_ensemble\_forecasts\_surface\_postprocessed\_belgium.zarr
- stations\_ensemble\_forecasts\_surface\_postprocessed\_france.zarr
- stations\_ensemble\_forecasts\_surface\_postprocessed\_germany.zarr
- stations\_ensemble\_forecasts\_surface\_postprocessed\_netherlands.zarr
- stations\_ensemble\_reforecasts\_pressure\_500\_austria.zarr
- 100   – stations\_ensemble\_reforecasts\_pressure\_500\_belgium.zarr
- stations\_ensemble\_reforecasts\_pressure\_500\_france.zarr
- stations\_ensemble\_reforecasts\_pressure\_500\_germany.zarr
- stations\_ensemble\_reforecasts\_pressure\_500\_netherlands.zarr
- stations\_ensemble\_reforecasts\_pressure\_700\_austria.zarr
- 105   – stations\_ensemble\_reforecasts\_pressure\_700\_belgium.zarr
- stations\_ensemble\_reforecasts\_pressure\_700\_france.zarr
- stations\_ensemble\_reforecasts\_pressure\_700\_germany.zarr
- stations\_ensemble\_reforecasts\_pressure\_700\_netherlands.zarr
- stations\_ensemble\_reforecasts\_pressure\_850\_austria.zarr
- 110   – stations\_ensemble\_reforecasts\_pressure\_850\_belgium.zarr
- stations\_ensemble\_reforecasts\_pressure\_850\_france.zarr
- stations\_ensemble\_reforecasts\_pressure\_850\_germany.zarr
- stations\_ensemble\_reforecasts\_pressure\_850\_netherlands.zarr
- stations\_ensemble\_reforecasts\_surface\_austria.zarr
- 115   – stations\_ensemble\_reforecasts\_surface\_belgium.zarr
- stations\_ensemble\_reforecasts\_surface\_france.zarr
- stations\_ensemble\_reforecasts\_surface\_germany.zarr
- stations\_ensemble\_reforecasts\_surface\_netherlands.zarr
- stations\_ensemble\_reforecasts\_surface\_postprocessed\_austria.zarr
- 120   – stations\_ensemble\_reforecasts\_surface\_postprocessed\_belgium.zarr
- stations\_ensemble\_reforecasts\_surface\_postprocessed\_france.zarr

- stations\_ensemble\_reforecasts\_surface\_postprocessed\_germany.zarr
- stations\_ensemble\_reforecasts\_surface\_postprocessed\_netherlands.zarr
- stations\_forecasts\_efi\_austria.zarr
- 125 – stations\_forecasts\_efi\_belgium.zarr
- stations\_forecasts\_efi\_france.zarr
- stations\_forecasts\_efi\_germany.zarr
- stations\_forecasts\_efi\_netherlands.zarr
- stations\_forecasts\_observations\_surface\_austria.zarr
- 130 – stations\_forecasts\_observations\_surface\_belgium.zarr
- stations\_forecasts\_observations\_surface\_france.zarr
- stations\_forecasts\_observations\_surface\_germany.zarr
- stations\_forecasts\_observations\_surface\_netherlands.zarr
- stations\_forecasts\_observations\_surface\_postprocessed\_austria.zarr
- 135 – stations\_forecasts\_observations\_surface\_postprocessed\_belgium.zarr
- stations\_forecasts\_observations\_surface\_postprocessed\_france.zarr
- stations\_forecasts\_observations\_surface\_postprocessed\_germany.zarr
- stations\_forecasts\_observations\_surface\_postprocessed\_netherlands.zarr
- stations\_highres\_forecasts\_pressure\_500\_austria.zarr
- 140 – stations\_highres\_forecasts\_pressure\_500\_belgium.zarr
- stations\_highres\_forecasts\_pressure\_500\_france.zarr
- stations\_highres\_forecasts\_pressure\_500\_germany.zarr
- stations\_highres\_forecasts\_pressure\_500\_netherlands.zarr
- stations\_highres\_forecasts\_pressure\_700\_austria.zarr
- 145 – stations\_highres\_forecasts\_pressure\_700\_belgium.zarr
- stations\_highres\_forecasts\_pressure\_700\_france.zarr
- stations\_highres\_forecasts\_pressure\_700\_germany.zarr
- stations\_highres\_forecasts\_pressure\_700\_netherlands.zarr
- stations\_highres\_forecasts\_pressure\_850\_austria.zarr
- 150 – stations\_highres\_forecasts\_pressure\_850\_belgium.zarr

- stations\_highres\_forecasts\_pressure\_850\_france.zarr
- stations\_highres\_forecasts\_pressure\_850\_germany.zarr
- stations\_highres\_forecasts\_pressure\_850\_netherlands.zarr
- stations\_highres\_forecasts\_surface\_austria.zarr
- 155 – stations\_highres\_forecasts\_surface\_belgium.zarr
- stations\_highres\_forecasts\_surface\_france.zarr
- stations\_highres\_forecasts\_surface\_germany.zarr
- stations\_highres\_forecasts\_surface\_netherlands.zarr
- stations\_highres\_forecasts\_surface\_postprocessed\_austria.zarr
- 160 – stations\_highres\_forecasts\_surface\_postprocessed\_belgium.zarr
- stations\_highres\_forecasts\_surface\_postprocessed\_france.zarr
- stations\_highres\_forecasts\_surface\_postprocessed\_germany.zarr
- stations\_highres\_forecasts\_surface\_postprocessed\_netherlands.zarr
- stations\_reforecasts\_observations\_surface\_austria.zarr
- 165 – stations\_reforecasts\_observations\_surface\_belgium.zarr
- stations\_reforecasts\_observations\_surface\_france.zarr
- stations\_reforecasts\_observations\_surface\_germany.zarr
- stations\_reforecasts\_observations\_surface\_netherlands.zarr
- stations\_reforecasts\_observations\_surface\_postprocessed\_austria.zarr
- 170 – stations\_reforecasts\_observations\_surface\_postprocessed\_belgium.zarr
- stations\_reforecasts\_observations\_surface\_postprocessed\_france.zarr
- stations\_reforecasts\_observations\_surface\_postprocessed\_germany.zarr
- stations\_reforecasts\_observations\_surface\_postprocessed\_netherlands.zarr

For instance, the example in the previous sections combine:

175      "<https://storage.ecmwf.europeanweather.cloud/eumetnet-postprocessing-benchmark-1st-phase-training-dataset/data/>"

and "stations\_data/" and "stations\_ensemble\_forecasts\_surface\_germany.zarr" to obtain the forecasts of instantaneous variables for Germany. Data paths are in general explicit, except maybe for the word "postprocessed" which means a variable that has been "processed", i.e. accumulated or filtered (see the article and the documentation where these variable are called *processed*).

## References

- 180 Bezanson, J., Edelman, A., Karpinski, S., and Shah, V. B.: Julia: A fresh approach to numerical computing, SIAM review, 59, 65–98, <https://doi.org/10.1137/141000671>, 2017.
- Hoyer, S. and Joseph, H.: xarray: N-D labeled Arrays and Datasets in Python, Journal of Open Research Software, 5, <https://doi.org/10.5334/jors.148>, 2017.
